# Supplementary material for: MRE11-dependent instability in mitochondrial DNA fork protection activates a cGAS immune signaling pathway
Source: PubMed Central journal article supplement — Sci Adv. 2021 Dec 15;7(51):eabf9441. doi: 10.1126/sciadv.abf9441 (PMC8673762; doi:10.1126/sciadv.abf9441), 2021-12-15
Supplement: sciadv.abf9441_sm.pdf [file sciadv.abf9441_sm.pdf]

Supplementary Materials for  
**MRE11-dependent instability in mitochondrial DNA fork protection activates  
a cGAS immune signaling pathway**

Jessica W. Luzwick, Eszter Dombi, Rebecca A. Boisvert, Sunetra Roy, Soyoung Park,  
Selvi Kunnimalaiyaan, Steffi Goffart, Detlev Schindler, Katharina Schlacher\*

\*Corresponding author. Email: [kschlacher@mdanderson.org](mailto:kschlacher@mdanderson.org)

Published 15 December 2021, *Sci. Adv.* 7, eabf9441 (2021)  
DOI: [10.1126/sciadv.abf9441](https://doi.org/10.1126/sciadv.abf9441)

**This PDF file includes:**

Figs. S1 to S8  
Tables S1 to S4

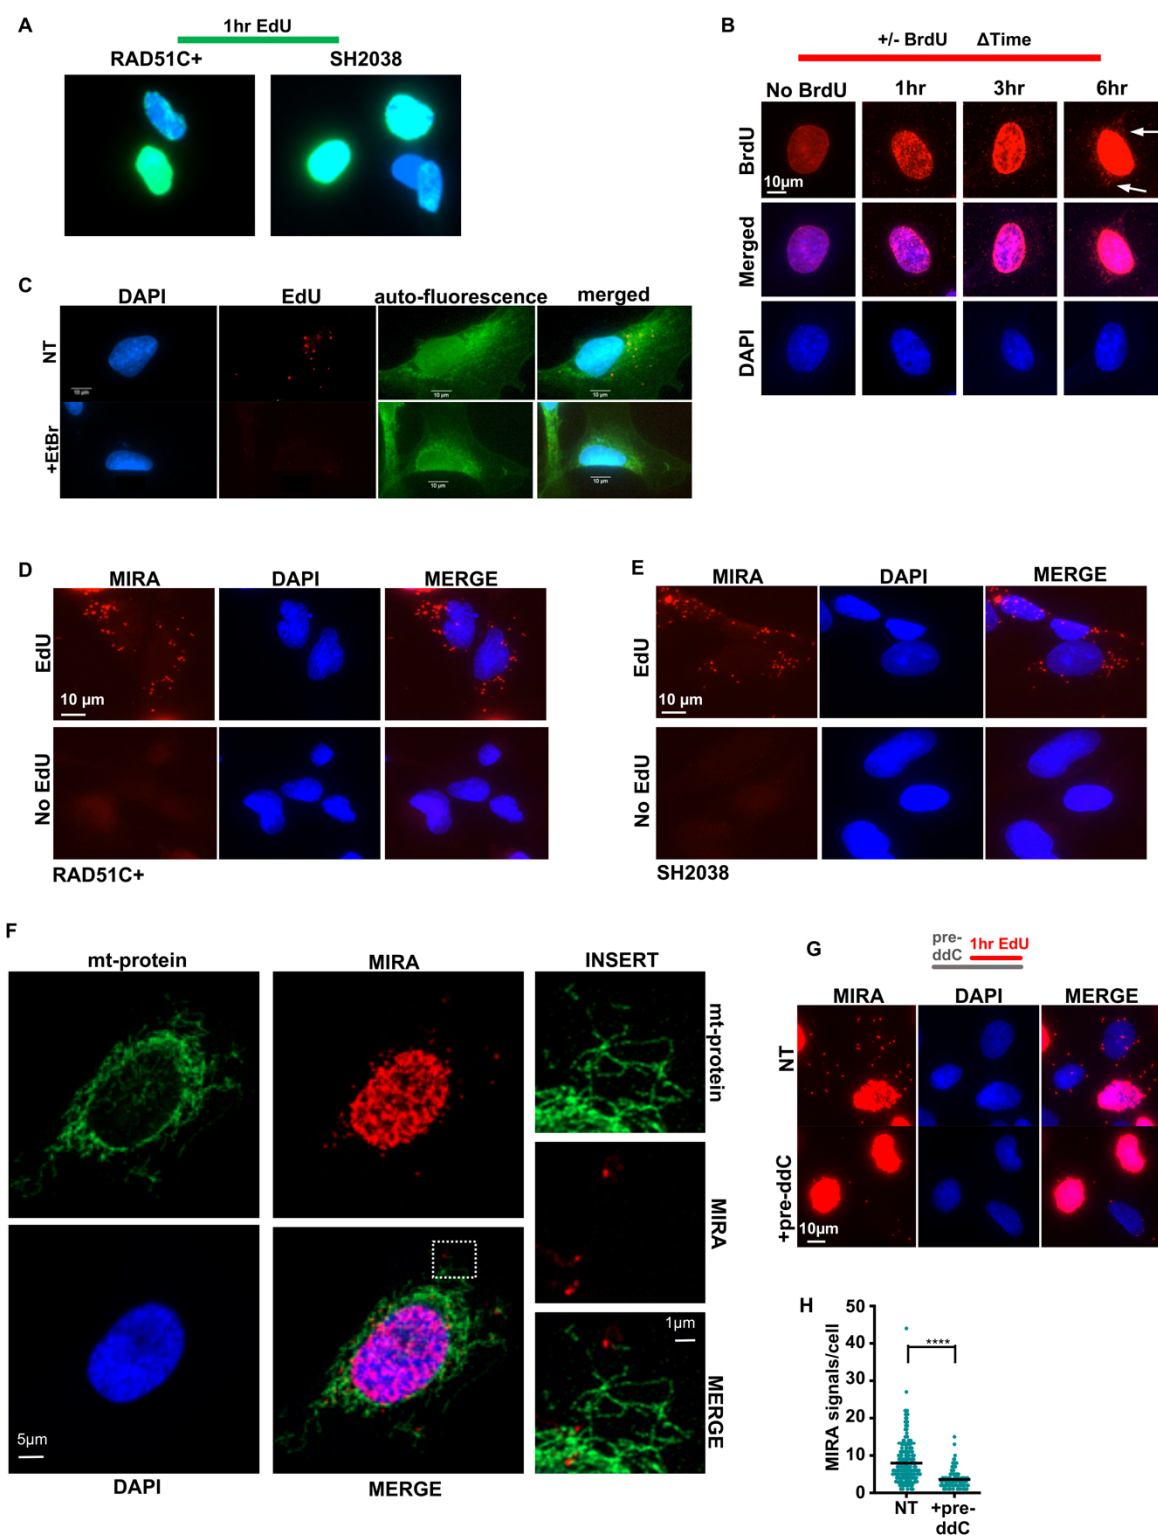

**fig. S1. Nascent mtDNA Replication Assay (MIRA) Development**

(A) Representative images of EdU labeled cells (1hr) clicked to Alexa Fluor488 in RAD51C+ cells. Note the absence of cytoplasmic signals with one hour labeling only.

(B) Visualization of DNA by BrdU incorporation for extended times in RAD51C+ cells. Arrows indicate mtDNA. Note that cytoplasmic signals increase with time of labeling and are minute with one hour labeling insufficient for efficient and accurate quantitation.

- (C)** Representative images of intra-cellular and extra-nuclear EdU-PLA signals. Auto-fluorescence of the cell displays the cytoplasm. The cytoplasmatic signals are inhibited in the presence of Ethidium bromide (EtBr), inhibiting mtDNA replication.
- (D, E)** Representative images of MIRA assays in RAD51C<sup>+</sup> and SH2038 cells, with and without EdU.
- (F)** Airyscan super-resolution image of RAD51C<sup>+</sup> cells with immunofluorescent stain against mitochondrial protein (mt-protein) and MIRA signals.
- (G)** Representative images of MIRA assay in RAD51C<sup>+</sup> cells in which cells were incubated with or without dideoxycytidine (20 $\mu$ M, ddC) for thirty minutes prior to and during EdU incubation to suppress EdU incorporation into mtDNA.
- (H)** Scatter dot plot quantification of (G) MIRA signals. Top, sketch of experimental scheme.

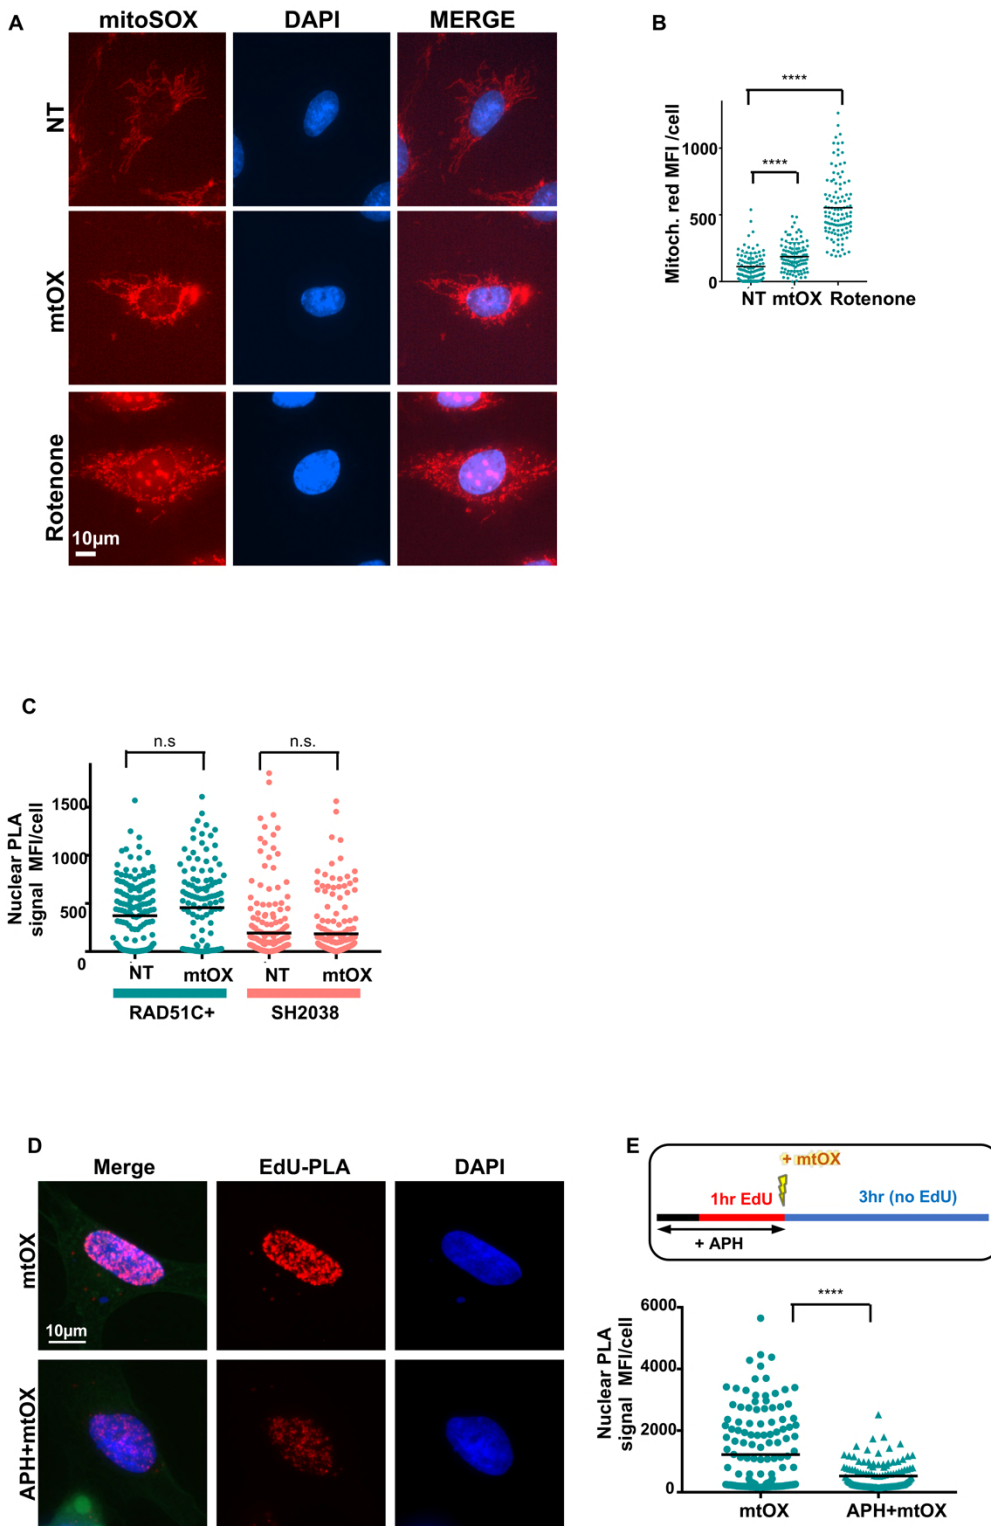

**fig. S2. Validation of mtOX and Aphidicolin**

(A) Representative images and (B) scatter dot blot analysis of red fluorescent mitoSOX signals in RAD51C+ cells treated with mtOX (4  $\mu$ M) or Rotenone (5  $\mu$ M, strong positive control for oxidative damage producing mitochondrial agent). The mitoSOX dye shows the statistically significant induction of mitochondrial superoxide with mtOX and the stronger Rotenone.

(C) Scatter dot plot quantification of nuclear EdU-PLA signals with and without mtOX (4  $\mu$ M).

(D) Representative images and (E) scatter dot blot quantification of MIRA signals in RAD51C+ cells treated with mtOX (4  $\mu$ M) or additionally aphidicolin (APH, 7 $\mu$ M), which represses nuclear EdU incorporation

MFI, mean fluorescence intensity. Bars represent the mean of compiled data and the  $p$ -values are derived from the Mann-Whitney.

\*\*\*\* $p < 0.0001$ , n.s. not significant

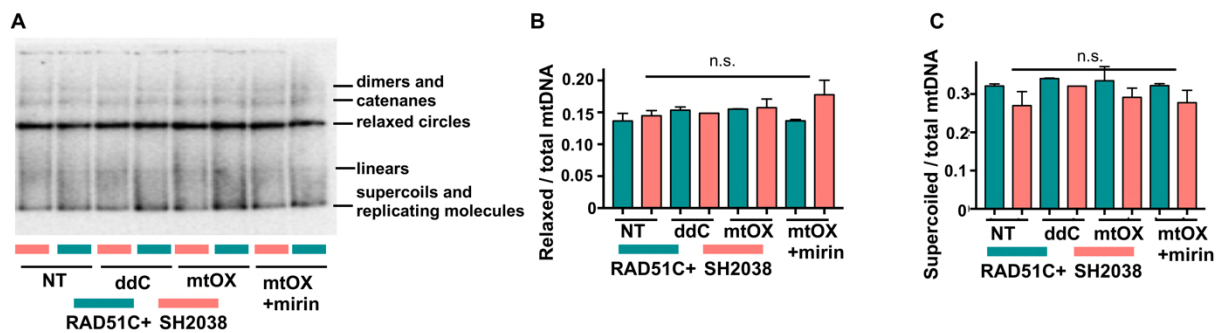

**fig. S3. mtOX Does Not Cause mtDNA Linearization.**

(A) Southern blot for assessment of mtDNA topology.

(B, C) Bar graph quantification of (A). There was no significant difference between any of the conditions (ANOVA/Tukey).

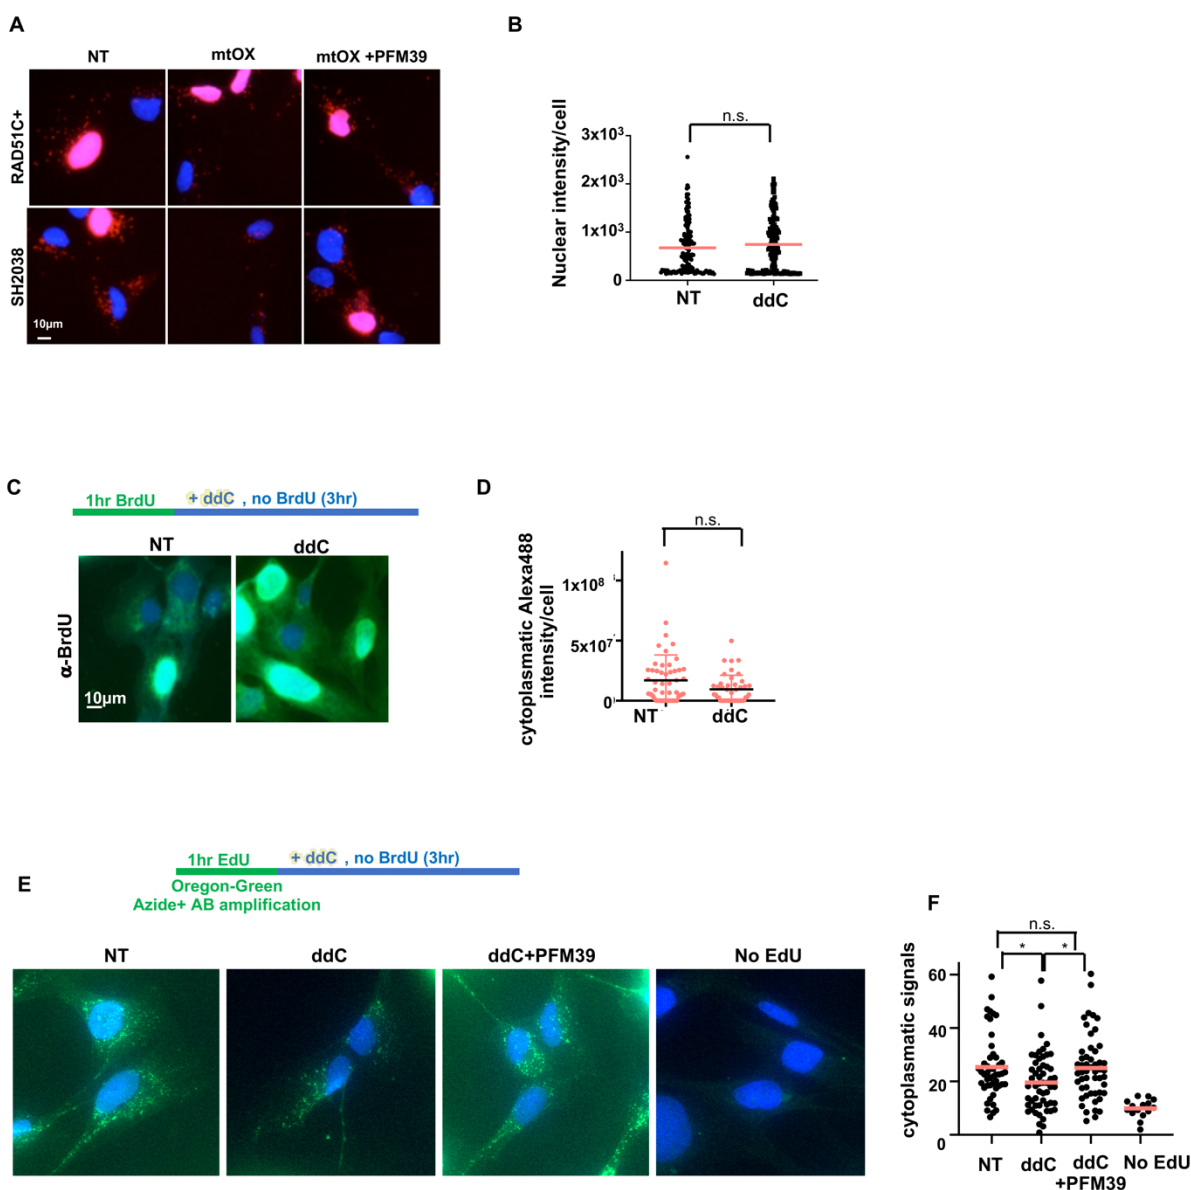

**fig. S4. MIRA Detects Nascent mtDNA Other Than 7S.**

(A) Representative images corresponding to data in Fig. 3C.

**(B)** Nuclear intensity of PLA signals in SH2038 cells with and without ddC.

**(C, D)** Representative images and scatter dot plot quantification of SH2038 cells labeled for one hour with BrdU and released into media with or without ddC (20  $\mu$ M) as indicated in the experimental sketch on top.

**(E, F)** Representative images and scatter dot plot quantification of SH2038 cells labeled for one hour with EdU and released into media with or without ddC (20  $\mu$ M) as indicated in the experimental sketch on top. EdU was detected by click-it conjugation to Oregon-green and subsequent anti-Oregongreen antibody detection for signal amplification.

Bars in scatter dot blots represent the mean of compiled data and the  $p$ -values are derived from the Mann-Whitney.  $p$ -values of the bar graphs for 7S DNA and mtDNA topology were derived using the ANOVA/Tukey analysis. \*\*\* $p$ <0.001, \*\* $p$ <0.01, \* $p$ <0.05 n.s. not significant

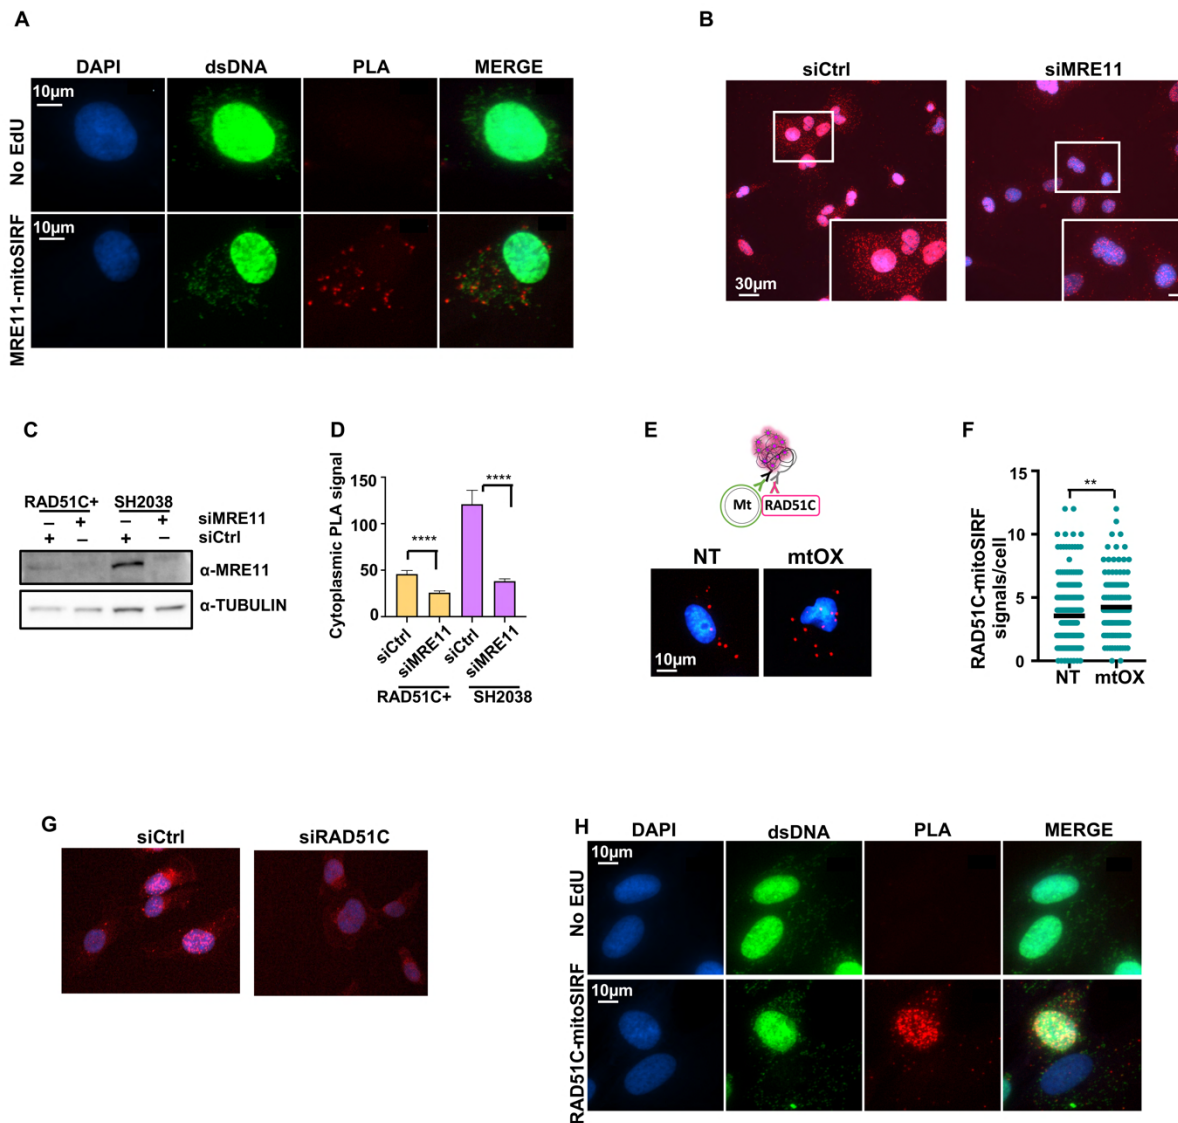

**fig. S5. Validation of mitoSIRF**

(A) Representative images of MRE11-mitoSIRF in BJ fibroblasts with and without EdU.  
 (B) Representative images of PLA against MRE11 in RAD51C+ cells transfected with siRNA against MRE11 or scramble siRNA (siCtrl)  
 (C) Western blot against MRE11 in SH2038 and RAD51C+ cells transfected with siRNA against MRE11 or scramble siRNA (siCtrl)  
 (D) Quantification of cytoplasmic MRE11-PLA signals of (C) in SH2038 and RAD51C+ cells transfected with siRNA against MRE11 or scramble siRNA (siCtrl)  
 (E, F) Representative images and scatter dot blot of analysis of RAD51C-mitoSIRF signals in RAD51C+ cells with and without mtOX (4  $\mu$ M, 3 hours).  
 (G) Representative images of PLA against RAD51C in RAD51C+ cells transfected with siRNA against RAD51C or scramble siRNA (siCtrl)  
 (H) Representative images of RAD51C-mitoSIRF in BJ fibroblasts with and without EdU.  
 Bars in scatter dot blots represent the mean of compiled data and the *p*-values are derived from the Mann-Whitney. \*\*\**p*<0.001, \*\**p*<0.01



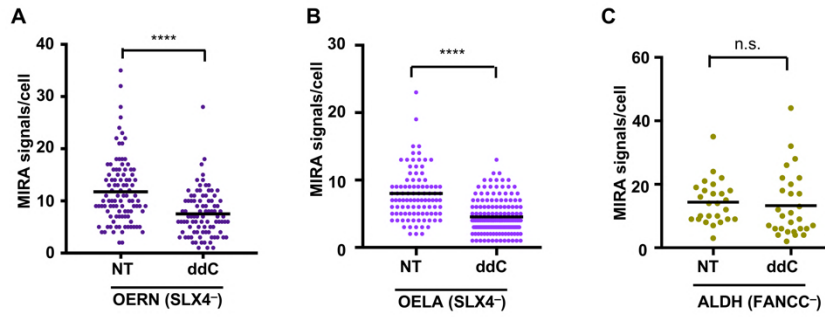

**fig. S6. SLX4 But Not FANCC Core Complex Proteins are Required for mtDNA Fork Protection Defects**

(A, B) Scatter dot plot quantification of MIRA assay signals with and without ddC in OERN, OELA, (SLX4 defective) patient fibroblasts.

(C) Scatter dot plot quantification of MIRA assay signals with and without ddC in ALDH (FANCC defective) patient fibroblasts.

Bars represent the mean of compiled data. *p*-values are derived using the Mann-Whitney test.

\*\*\*\**p*<0.0001, n.s. not significant

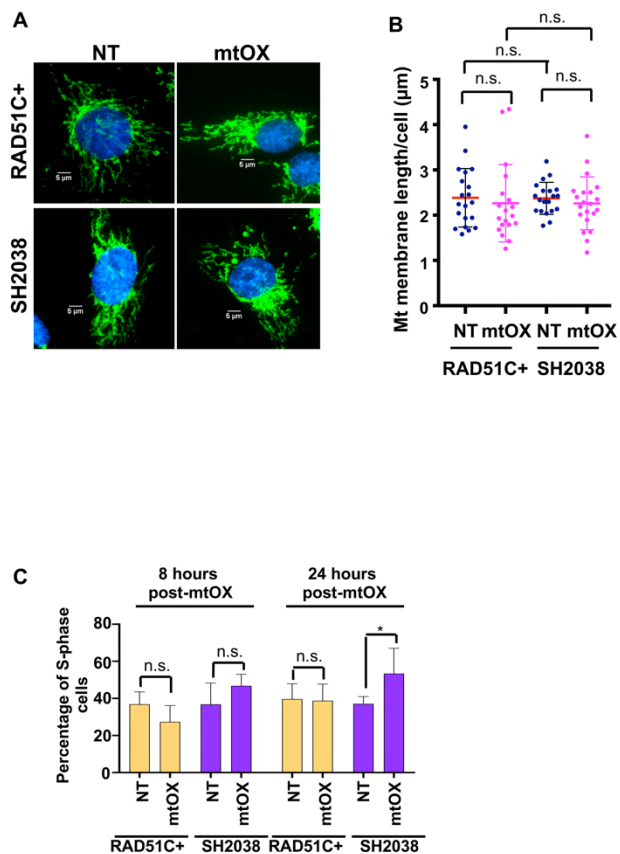

**fig. S7. Effects of mtOX on Mitochondrial Physiology**

(A) Representative immunofluorescence images of cells treated with mtOX (4 μM), or left untreated as indicated and stained for mitochondrial protein (mt-protein, depicted in green; DAPI depicted in blue).

(B) Scatter dot plot of mitochondrial length measurements. Error bars represent the standard deviation and the *p*-values are derived from the Mann Whitney-test.

(C) Bar graph of EdU positive cells 8 hours or 24 hours after treatment with mtOX and labeled with EdU thirty minutes prior to fixation. Error bars represent the standard deviation and the *p*-values are derived from the Student T-test.

Figure S8.

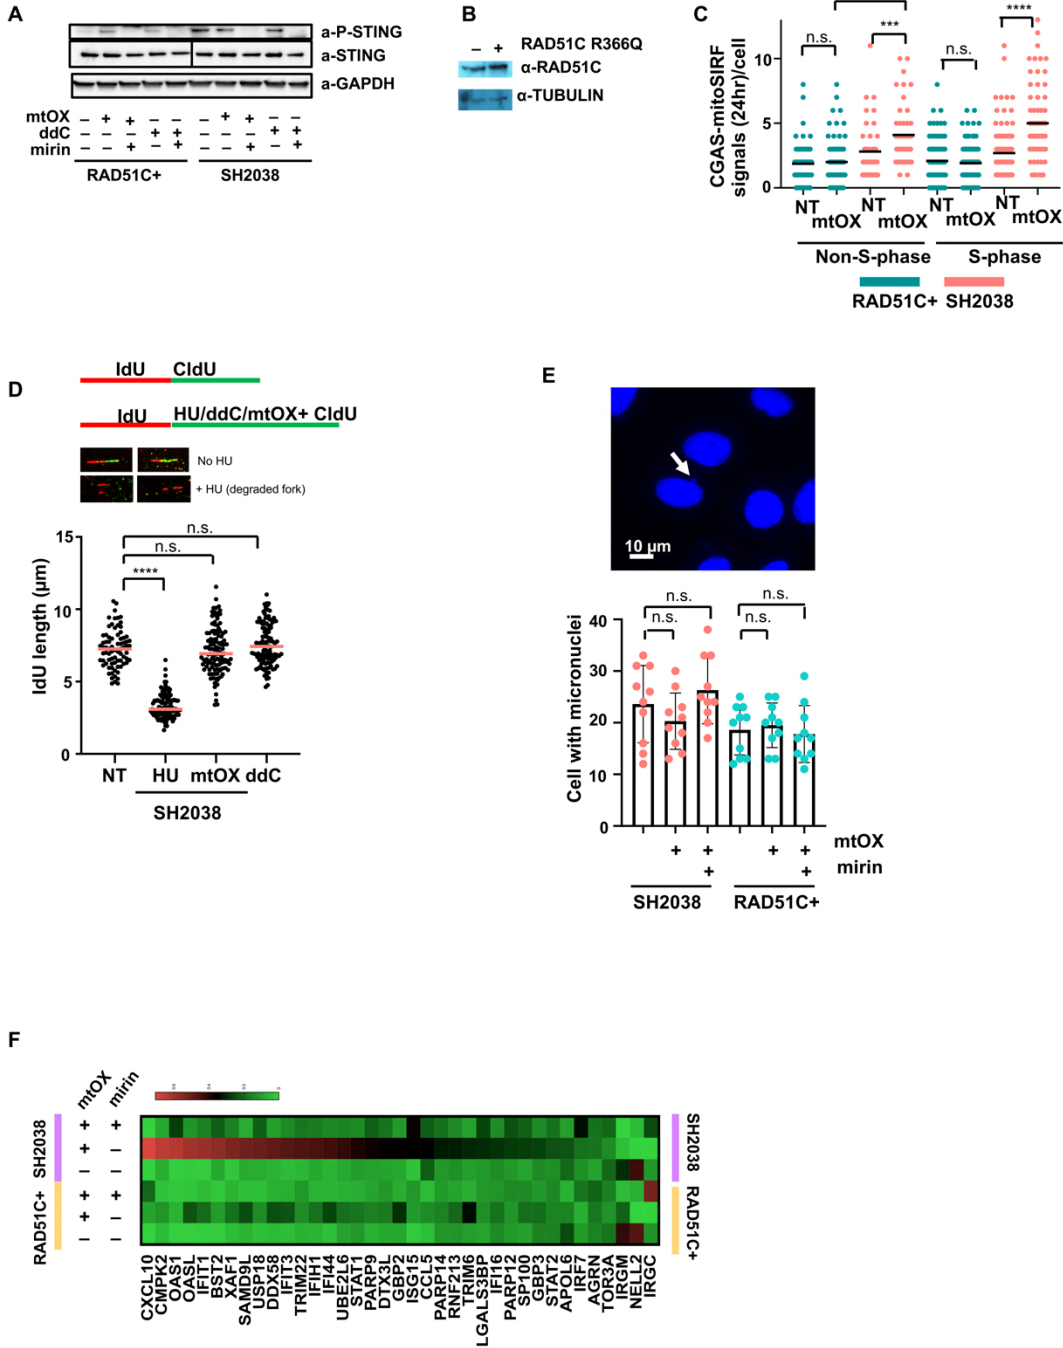

**fig. S8. cGAS after mtOX Treatment is Activated by Mitochondrial and Not Nuclear DNA**

(A) Western blot of STING and P-STING twenty-four hours after mtOX treatment with and without MRE11 inhibition by mirin.

(B) Western blot against RAD51C in SH2038 cells with and without expressing RAD51C R366Q from stably transfected expression plasmid.

(C) Scatter dot plot quantification of cGAS-mitoSIRF signals in S-phase cells and non-S phase cells following the experimental schemes of main Fig. 6D.

(D) Single-molecule DNA fiber analysis of SH2038 cells exposed to HU, mtOX or ddC as delineated in sketch above.

(E) Analysis of micronuclei twenty-four hours after mtOX treatment with and without MRE11 inhibition by mirin.

(F) Heatmap of RNAseq data of SH2038 and RAD51C+ cells with and without mtOX (4  $\mu$ M) and mirin (50  $\mu$ M) of previously reported mtDNA-cGAS-activated inflammation genes in TFAM heterozygous cells.

Bars of the scatter graphs represent the mean of compiled data and  $p$ -values are derived using the Mann-Whitney test. \*\*\*\* $p$ <0.001, \*\*\* $p$ <0.001, n.s. not significant

| Gene ID         | Gene name | fpkm (RAD51C+,<br>no treatment) | fpkm (RAD51C+,<br>mtOX) | fpkm (RAD51C+,<br>mtOX+mirin) | fpkm (SH2038,<br>no treatment) | fpkm (SH2038,<br>mtOX) | fpkm (SH2038,<br>mtOX+mirin) |
|-----------------|-----------|---------------------------------|-------------------------|-------------------------------|--------------------------------|------------------------|------------------------------|
| ENSG00000134321 | RSAD2     | 0.289907472                     | 4.691412128             | 0.272464236                   | 0.767713348                    | 26.94902321            | 3.241440588                  |
| ENSG00000183486 | MX2       | 0.37108727                      | 6.5048623               | 1.498821472                   | 1.277381313                    | 35.91227627            | 10.33842858                  |
| ENSG00000089127 | OAS1      | 0.267472421                     | 3.814568561             | 1.417087861                   | 0.638860957                    | 40.67265218            | 17.13831598                  |
| ENSG00000162654 | GBP4      | 0.007239406                     | 0.190606306             | 0                             | 0.008645703                    | 0.404970821            | 0.037421084                  |
| ENSG00000157601 | MX1       | 4.410018988                     | 26.55722604             | 5.006118109                   | 11.08294883                    | 130.6270565            | 33.74761984                  |
| ENSG00000135114 | OASL      | 0.574392214                     | 27.39483418             | 2.948494273                   | 1.549786801                    | 69.30856698            | 14.10313172                  |
| ENSG00000111335 | OAS2      | 0.412263857                     | 8.421203212             | 3.609892132                   | 1.163732781                    | 47.17217145            | 19.49404116                  |
| ENSG00000185745 | IFIT1     | 1.249460371                     | 32.60947612             | 8.086254409                   | 1.989566986                    | 96.66952721            | 25.99985584                  |
| ENSG00000130303 | BST2      | 0.696460736                     | 6.56385268              | 1.439060372                   | 5.042497975                    | 35.16127556            | 13.44398358                  |
| ENSG00000132530 | XAF1      | 1.224284934                     | 5.553072453             | 1.836933876                   | 0.818781224                    | 16.0257785             | 4.746321767                  |
| ENSG00000184979 | USP18     | 2.000075596                     | 7.380376437             | 2.013343054                   | 4.155171868                    | 27.29498386            | 11.71164371                  |
| ENSG00000119917 | IFIT3     | 14.14553331                     | 81.71000621             | 24.04234899                   | 17.14805872                    | 163.2300765            | 48.73096985                  |
| ENSG00000117228 | GBP1      | 2.645274336                     | 17.05329812             | 2.750317739                   | 1.710470398                    | 24.26480546            | 4.06054213                   |
| ENSG00000132274 | TRIM22    | 1.231694541                     | 2.681720403             | 2.226567893                   | 1.063343346                    | 8.898985166            | 3.41348771                   |
| ENSG00000172183 | ISG20     | 1.086458352                     | 2.082274089             | 0.930992014                   | 1.363324822                    | 5.311315228            | 0.885129196                  |
| ENSG00000185885 | IFITM1    | 0.466903612                     | 4.221873943             | 4.155796612                   | 2.973879073                    | 37.49453841            | 33.05103476                  |
| ENSG00000165949 | IFI27     | 1.697569306                     | 3.342316872             | 3.179758548                   | 4.141860901                    | 27.30402933            | 21.74847971                  |
| ENSG00000156587 | UBE2L6    | 12.85840081                     | 25.95135754             | 8.892068674                   | 11.61819214                    | 57.66988388            | 21.35370063                  |
| ENSG00000111331 | OAS3      | 10.22580757                     | 27.59665273             | 19.32326581                   | 13.52096428                    | 103.2090323            | 73.80162548                  |
| ENSG00000068079 | IFI35     | 22.98211696                     | 31.31134789             | 19.17875977                   | 15.1532139                     | 76.81697333            | 31.13094982                  |
| ENSG00000115415 | STAT1     | 37.02838136                     | 57.76410338             | 23.16198874                   | 34.32747407                    | 127.1715774            | 46.30797103                  |
| ENSG00000126709 | IFI6      | 92.61457857                     | 196.8710434             | 123.3961691                   | 387.4971505                    | 994.3317131            | 823.1279084                  |
| ENSG00000106785 | TRIM14    | 3.943626827                     | 21.86997668             | 14.23298358                   | 3.865283301                    | 41.55853478            | 25.84150196                  |
| ENSG00000162645 | GBP2      | 0.156394348                     | 0.547107821             | 0.137673141                   | 0.158040258                    | 0.686433779            | 0.202103796                  |
| ENSG00000187608 | ISG15     | 28.57239967                     | 210.9168689             | 221.9514361                   | 63.77527591                    | 694.9611298            | 717.8270286                  |
| ENSG00000101347 | SAMHD1    | 20.48119932                     | 28.92759471             | 10.90511907                   | 24.50408133                    | 61.38827049            | 25.58061402                  |
| ENSG00000142089 | IFITM3    | 83.93574775                     | 178.8295255             | 179.1819909                   | 135.1184993                    | 480.8355182            | 484.8768107                  |
| ENSG00000179583 | CIITA     | 0.103393574                     | 0.281224074             | 0.286840925                   | 0.061739185                    | 0.394350957            | 0.157905636                  |
| ENSG00000121236 | TRIM6     | 0.886334803                     | 2.823443424             | 0.613224679                   | 0.85614815                     | 2.551982593            | 0.808506554                  |
| ENSG00000055332 | EIF2AK2   | 9.165343014                     | 17.03208371             | 11.92927761                   | 9.911850553                    | 25.27708735            | 15.47439067                  |
| ENSG00000185201 | IFITM2    | 31.76928372                     | 74.91348446             | 83.01683455                   | 39.38753913                    | 136.2996587            | 137.6021821                  |
| ENSG00000067066 | SP100     | 13.42558364                     | 26.04965122             | 19.41023427                   | 12.41749642                    | 36.16421351            | 28.85182469                  |
| ENSG00000163462 | TRIM46    | 0.721885332                     | 2.687790187             | 2.379750923                   | 0.830185501                    | 3.350219367            | 3.144121082                  |
| ENSG00000026508 | CD44      | 64.66345407                     | 134.2076486             | 79.77621024                   | 50.15565488                    | 137.1422591            | 75.09398828                  |
| ENSG00000140464 | PML       | 16.44118866                     | 26.87167206             | 40.89085458                   | 15.1657907                     | 46.89219985            | 47.1163422                   |
| ENSG00000182179 | UBA7      | 3.522652594                     | 8.318991711             | 12.24082127                   | 2.520957471                    | 11.4021959             | 12.47516749                  |
| ENSG00000102882 | MAPK3     | 8.881536183                     | 22.8093079              | 21.04841948                   | 9.96711443                     | 25.28619504            | 24.71872173                  |
| ENSG00000120738 | EGR1      | 208.2236856                     | 11.84152305             | 46.04749783                   | 360.4913255                    | 14.96028287            | 98.25459308                  |
| ENSG00000058404 | CAMK2B    | 1.705610339                     | 0.119370039             | 0.126827292                   | 2.072670666                    | 0.078114655            | 0.296459221                  |

**Table S1.** fpkm values related to Fig. 7B

| Gene ID         | Gene name | fpkm (RAD51C+,<br>no treatment) | fpkm (RAD51C+,<br>mtOX) | fpkm (RAD51C+,<br>mtOX+mirin) | fpkm (SH2038, no<br>treatment) | fpkm (SH2038,<br>mtOX) | fpkm (SH2038,<br>mtOX+mirin) |
|-----------------|-----------|---------------------------------|-------------------------|-------------------------------|--------------------------------|------------------------|------------------------------|
| ENSG00000137959 | IFI44L    | 0.068875533                     | 1.009747265             | 0.054736119                   | 0.061691251                    | 6.713647454            | 0.945686801                  |
| ENSG00000183486 | MX2       | 0.37108727                      | 6.5048623               | 1.498821472                   | 1.277381313                    | 35.91227627            | 10.33842858                  |
| ENSG00000135114 | OASL      | 0.574392214                     | 27.39483418             | 2.948494273                   | 1.549786801                    | 69.30856698            | 14.10313172                  |
| ENSG00000111335 | OAS2      | 0.412263857                     | 8.421203212             | 3.609892132                   | 1.163732781                    | 47.17217145            | 19.49404116                  |
| ENSG00000185745 | IFIT1     | 1.249460371                     | 32.60947612             | 8.086254409                   | 1.989566986                    | 96.66952721            | 25.99985584                  |
| ENSG00000130303 | BST2      | 0.696460736                     | 6.56385268              | 1.439060372                   | 5.042497975                    | 35.16127556            | 13.44398358                  |
| ENSG00000168062 | BATF2     | 0.258987017                     | 0.805866248             | 0.263449265                   | 0.577353907                    | 4.133817289            | 1.450285513                  |
| ENSG00000133321 | RARRES3   | 0.425589113                     | 3.112592847             | 0.12025607                    | 0.734156581                    | 4.973093487            | 0.54997624                   |
| ENSG00000136514 | RTP4      | 0                               | 0.375754452             | 0                             | 0                              | 0.60674219             | 0.258197054                  |
| ENSG00000107201 | DDX58     | 2.10212717                      | 10.23538539             | 2.733958386                   | 2.533404207                    | 20.55453106            | 4.192615042                  |
| ENSG00000119917 | IFIT3     | 14.14553331                     | 81.71000621             | 24.04234899                   | 17.14805872                    | 163.2300765            | 48.73096985                  |
| ENSG00000185885 | IFITM1    | 0.466903612                     | 4.221873943             | 4.155796612                   | 2.973879073                    | 37.49453841            | 33.05103476                  |
| ENSG00000115267 | IFIH1     | 2.048141854                     | 6.20173007              | 1.961060392                   | 2.711234677                    | 14.85302749            | 5.389172213                  |
| ENSG00000165949 | IFI27     | 1.697569306                     | 3.342316872             | 3.179758548                   | 4.141860901                    | 27.30402933            | 21.74847971                  |
| ENSG00000107201 | DDX58     | 2.10212717                      | 10.23538539             | 2.733958386                   | 2.533404207                    | 20.55453106            | 4.192615042                  |
| ENSG00000111331 | OAS3      | 10.22580757                     | 27.59665273             | 19.32326581                   | 13.52096428                    | 103.2090323            | 73.80162548                  |
| ENSG00000138642 | HERC6     | 3.038392853                     | 12.48123464             | 3.952929297                   | 4.301103371                    | 25.86911402            | 12.6888726                   |
| ENSG00000068079 | IFI35     | 22.98211696                     | 31.31134789             | 19.17875977                   | 15.1532139                     | 76.81697333            | 31.13094982                  |
| ENSG00000187608 | ISG15     | 28.57239967                     | 210.9168689             | 221.9514361                   | 63.77527591                    | 694.9611298            | 717.8270286                  |
| ENSG00000188313 | PLSCR1    | 28.08739911                     | 26.22100017             | 15.55864741                   | 30.03261611                    | 64.71489573            | 33.2418589                   |
| ENSG00000138646 | HERC5     | 9.671669757                     | 10.51704068             | 3.756795522                   | 11.38457923                    | 19.01378235            | 8.239815448                  |

**Table S2.** fpkm values related to Fig. 7J

| Gene ID         | Gene name | fpkm (RAD51C+, no treatment) | fpkm (RAD51C+, mtOX) | fpkm (RAD51C+, mtOX+mirin) | fpkm (SH2038, no treatment) | fpkm (SH2038, mtOX) | fpkm (SH2038, mtOX+mirin) |
|-----------------|-----------|------------------------------|----------------------|----------------------------|-----------------------------|---------------------|---------------------------|
| ENSG00000137959 | IFI44L    | 0.068875533                  | 1.009747265          | 0.054736119                | 0.061691251                 | 6.713647454         | 0.945686801               |
| ENSG00000183486 | MX2       | 0.37108727                   | 6.5048623            | 1.498821472                | 1.277381313                 | 35.91227627         | 10.33842858               |
| ENSG00000135114 | OASL      | 0.574392214                  | 27.39483418          | 2.948494273                | 1.549786801                 | 69.30856698         | 14.10313172               |
| ENSG00000111335 | OAS2      | 0.412263857                  | 8.421203212          | 3.609892132                | 1.163732781                 | 47.17217145         | 19.49404116               |
| ENSG00000185745 | IFIT1     | 1.249460371                  | 32.60947612          | 8.086254409                | 1.989566986                 | 96.66952721         | 25.99985584               |
| ENSG00000130303 | BST2      | 0.696460736                  | 6.56385268           | 1.439060372                | 5.042497975                 | 35.16127556         | 13.44398358               |
| ENSG00000168062 | BATF2     | 0.258987017                  | 0.805866248          | 0.263449265                | 0.577353907                 | 4.133817289         | 1.450285513               |
| ENSG00000133321 | RARRES3   | 0.425589113                  | 3.112592847          | 0.12025607                 | 0.734156581                 | 4.973093487         | 0.54997624                |
| ENSG00000136514 | RTP4      | 0                            | 0.375754452          | 0                          | 0                           | 0.60674219          | 0.258197054               |
| ENSG00000107201 | DDX58     | 2.10212717                   | 10.23538539          | 2.733958386                | 2.533404207                 | 20.55453106         | 4.192615042               |
| ENSG00000119917 | IFIT3     | 14.14553331                  | 81.71000621          | 24.04234899                | 17.14805872                 | 163.2300765         | 48.73096985               |
| ENSG00000185885 | IFITM1    | 0.466903612                  | 4.221873943          | 4.155796612                | 2.973879073                 | 37.49453841         | 33.05103476               |
| ENSG00000115267 | IFIH1     | 2.048141854                  | 6.20173007           | 1.961060392                | 2.711234677                 | 14.85302749         | 5.389172213               |
| ENSG00000165949 | IFI27     | 1.697569306                  | 3.342316872          | 3.179758548                | 4.141860901                 | 27.30402933         | 21.74847971               |
| ENSG00000107201 | DDX58     | 2.10212717                   | 10.23538539          | 2.733958386                | 2.533404207                 | 20.55453106         | 4.192615042               |
| ENSG00000111331 | OAS3      | 10.22580757                  | 27.59665273          | 19.32326581                | 13.52096428                 | 103.2090323         | 73.80162548               |
| ENSG00000138642 | HERC6     | 3.038392853                  | 12.48123464          | 3.952929297                | 4.301103371                 | 25.86911402         | 12.6888726                |
| ENSG00000068079 | IFI35     | 22.98211696                  | 31.31134789          | 19.17875977                | 15.1532139                  | 76.81697333         | 31.13094982               |
| ENSG00000187608 | ISG15     | 28.57239967                  | 210.9168689          | 221.9514361                | 63.77527591                 | 694.9611298         | 717.8270286               |
| ENSG00000188313 | PLSCR1    | 28.08739911                  | 26.22100017          | 15.55864741                | 30.03261611                 | 64.71489573         | 33.2418589                |
| ENSG00000138646 | HERC5     | 9.671669757                  | 10.51704068          | 3.756795522                | 11.38457923                 | 19.01378235         | 8.239815448               |

**Table S3.** fpkm values related to Fig. 7K

| Gene ID         | Gene name | fpkm (RAD51C+, no treatment) | fpkm (RAD51C+, mtOX) | fpkm (RAD51C+, mtOX+mirin) | fpkm (SH2038, no treatment) | fpkm (SH2038, mtOX) | fpkm (SH2038, mtOX+mirin) |
|-----------------|-----------|------------------------------|----------------------|----------------------------|-----------------------------|---------------------|---------------------------|
| ENSG00000169245 | CXCL10    | 0                            | 0.045254779          | 0.096163848                | 0                           | 0.338449271         | 0                         |
| ENSG00000134326 | CMPK2     | 0.815138588                  | 2.22716595           | 0.586686167                | 1.322468763                 | 11.92448377         | 1.55025665                |
| ENSG00000089127 | OAS1      | 0.267472421                  | 3.814568561          | 1.417087861                | 0.638860957                 | 40.67265218         | 17.13831598               |
| ENSG00000135114 | OASL      | 0.574392214                  | 27.39483418          | 2.948494273                | 1.549786801                 | 69.30856698         | 14.10313172               |
| ENSG00000185745 | IFIT1     | 1.249460371                  | 32.60947612          | 8.086254409                | 1.989566986                 | 96.66952721         | 25.99985584               |
| ENSG00000130303 | BST2      | 0.696460736                  | 6.56385268           | 1.439060372                | 5.042497975                 | 35.16127556         | 13.44398358               |
| ENSG00000132530 | XAF1      | 1.224284934                  | 5.553072453          | 1.836933876                | 0.818781224                 | 16.0257785          | 4.746321767               |
| ENSG00000177409 | SAMD9L    | 0.938846694                  | 3.6832785            | 0.537595541                | 1.128648387                 | 7.735231048         | 1.157000758               |
| ENSG00000184979 | USP18     | 2.000075596                  | 7.380376437          | 2.013343054                | 4.155171868                 | 27.29498386         | 11.71164371               |
| ENSG00000107201 | DDX58     | 2.10212717                   | 10.23538539          | 2.733958386                | 2.533404207                 | 20.55453106         | 4.192615042               |
| ENSG00000119917 | IFIT3     | 14.14553331                  | 81.71000621          | 24.04234899                | 17.14805872                 | 163.2300765         | 48.73096985               |
| ENSG00000132274 | TRIM22    | 1.231694541                  | 2.681720403          | 2.226567893                | 1.063343346                 | 8.898985166         | 3.41348771                |
| ENSG00000115267 | IFIH1     | 2.048141854                  | 6.20173007           | 1.961060392                | 2.711234677                 | 14.85302749         | 5.389172213               |
| ENSG00000137965 | IFI44     | 8.492553254                  | 56.41929707          | 13.60689948                | 13.25090531                 | 95.83796988         | 32.21050332               |
| ENSG00000156587 | UBE2L6    | 12.85840081                  | 25.95135754          | 8.892068674                | 11.61819214                 | 57.66988388         | 21.35370063               |
| ENSG00000115415 | STAT1     | 37.02838136                  | 57.76410338          | 23.16198874                | 34.32747407                 | 127.1715774         | 46.30797103               |
| ENSG00000138496 | PARP9     | 2.267265731                  | 5.66991107           | 3.316182384                | 3.529394544                 | 13.37950243         | 7.621180572               |
| ENSG00000163840 | DTX3L     | 6.583834252                  | 13.25287139          | 9.159729434                | 7.555853608                 | 29.19323949         | 14.49599572               |
| ENSG00000162645 | GBP2      | 0.156394348                  | 0.547107821          | 0.137673141                | 0.158040258                 | 0.686433779         | 0.202103796               |
| ENSG00000187608 | ISG15     | 28.57239967                  | 210.9168689          | 221.9514361                | 63.77527591                 | 694.9611298         | 717.8270286               |
| ENSG00000161570 | CCL5      | 0.324951232                  | 1.127788886          | 0.371868771                | 1.785144444                 | 2.872076795         | 1.805676976               |
| ENSG00000173193 | PARP14    | 7.812348338                  | 9.852947588          | 6.845288515                | 7.295688135                 | 20.18060942         | 11.98435839               |
| ENSG00000173821 | RNF213    | 7.712502578                  | 12.89341442          | 5.994937868                | 8.39554982                  | 20.09988414         | 9.141757619               |
| ENSG00000116525 | TRIM62    | 9.072492795                  | 3.892095363          | 9.271473591                | 12.80765657                 | 4.013902989         | 10.62341522               |
| ENSG00000108679 | LGALS3BP  | 49.3539444                   | 69.46149499          | 60.66821231                | 59.07338741                 | 156.9433247         | 137.4243887               |
| ENSG00000163565 | IFI16     | 15.99297196                  | 20.94875234          | 13.86150278                | 15.54090775                 | 32.51177191         | 15.33420945               |
| ENSG00000059378 | PARP12    | 7.326426148                  | 7.984953079          | 9.330679883                | 7.507654082                 | 17.84465089         | 15.83994031               |
| ENSG00000067066 | SP100     | 13.42558364                  | 26.04965122          | 19.41023427                | 12.41749642                 | 36.16421351         | 28.85182469               |
| ENSG00000117226 | GBP3      | 5.909288512                  | 7.1586712            | 4.232307433                | 5.213687874                 | 9.795497632         | 5.174049927               |
| ENSG00000170581 | STAT2     | 38.99741915                  | 38.05584566          | 36.78566416                | 32.95007889                 | 60.44939646         | 46.77557054               |
| ENSG00000221963 | APOL6     | 12.80523853                  | 7.904634175          | 3.252791511                | 10.35625044                 | 12.25671042         | 5.285594032               |
| ENSG00000185507 | IRF7      | 27.53046725                  | 17.0044337           | 44.71309484                | 32.82676396                 | 46.91521996         | 82.77966226               |
| ENSG00000188157 | AGRN      | 81.27361784                  | 92.83694474          | 110.2432045                | 51.14210057                 | 96.22110349         | 98.28031261               |
| ENSG00000186283 | TOR3A     | 27.12805973                  | 18.63001708          | 24.22471121                | 30.76433686                 | 20.53139323         | 30.890377                 |
| ENSG00000237693 | IRGM      | 0.320837925                  | 0.159987511          | 0.033996442                | 0.223511481                 | 0.029912673         | 0                         |
| ENSG00000184613 | NELL2     | 0.331563612                  | 0                    | 0.046843934                | 0.307978029                 | 0                   | 0.031738508               |
| ENSG00000124449 | IRGC      | 0.106752932                  | 0                    | 0.441155992                | 0.095617727                 | 0                   | 0.206930491               |

**Table S4.** fpkm values related to fig. S8F
